P1259

## Right atrial low voltage zone as a novel predictor of sinus node dysfunction in patients with non-paroxysmal atrial fibrillation

T. Kondo, M. Kimura, M. Nakayama, O. Matsuda

*Hiroshima Heart Center, Department of Cardiology, Hiroshima, Japan*

**Background:** Although sinus node dysfunction (SND) coexists with atrial fibrillation (AF) in some cases, SND in patients with Non-paroxysmal AF (Non-PAF) could not be estimated in conventional electrophysiological study.

Atrial low voltage zone (LVZ), which may be surrogate for atrial fibrosis, is although reported to present in patients with Non-PAF, the association between SND and right atrial LVZ (RA-LVZ) has not been fully evaluated. The aim of the present study was to assess the relationship between SND and RA-LVZ in patients with Non-PAF.

**Method:** Eighty-six Non-PAF patients underwent high density voltage mapping of right atrium (RA) during AF before ablation procedure. We defined LVZ as that with electrogram amplitude  $<0.1$  mV in order to delineate strongly damaged area in RA. We evaluated the surface area of the RA-LVZ in Non-PAF patients with and without SND.

**Results:** Twenty-seven of 86 patients (31.4%) presented with SND after AF termination. There were no significant differences between patients with and without SND in variables such as age, sex, AF duration, left atrial di-

ameter, and left ventricular ejection fraction. The mean value of RA-LVZ of all the patients was  $12.1 \pm 11.4\%$ , and RA-LVZ was significantly larger in patients with SND than in those without SND ( $22.8 \pm 14.6$  vs  $7.2 \pm 4.2\%$ ;  $P < 0.001$ ). In multivariate logistic regression analysis for the incidence of subsequent pacemaker implantation (PMI), only RA-LVZ was a significant predictor of subsequent PMI (odds ratio 1.306; 95% confidence interval 1.159 - 1.473;  $P < 0.001$ ). Receiving-operating characteristic curve for PMI following ablation procedure indicated cut-off value 10.5% for RA-LVZ with 85.2% sensitivity and 88.1% specificity (area under curve = 0.924,  $P < 0.001$ ). Kaplan-Meier analysis of the incidence of PMI after AF termination showed that freedom from pacemaker implantation was significantly better in patients with RA-LVZ  $<10.5\%$  than in those with RA-LVZ  $\geq 10.5\%$  (log-rank test;  $P < 0.001$ ).

**Conclusions:** Broad RA-LVZ measured during AF was strongly associated with SND and PMI after AF termination in patients with Non-PAF. Evaluation of RA-LVZ during AF could be a potential target in predicting SND requiring PMI in patients with Non-PAF.
